# Supplementary material
Source: Springer Nature journal article supplement (https://www.springermedizin.de/resource/supplementary/12947_2012_424_MOESM2_ESM.pdf/9555732)

**Cumulative survival from AF**

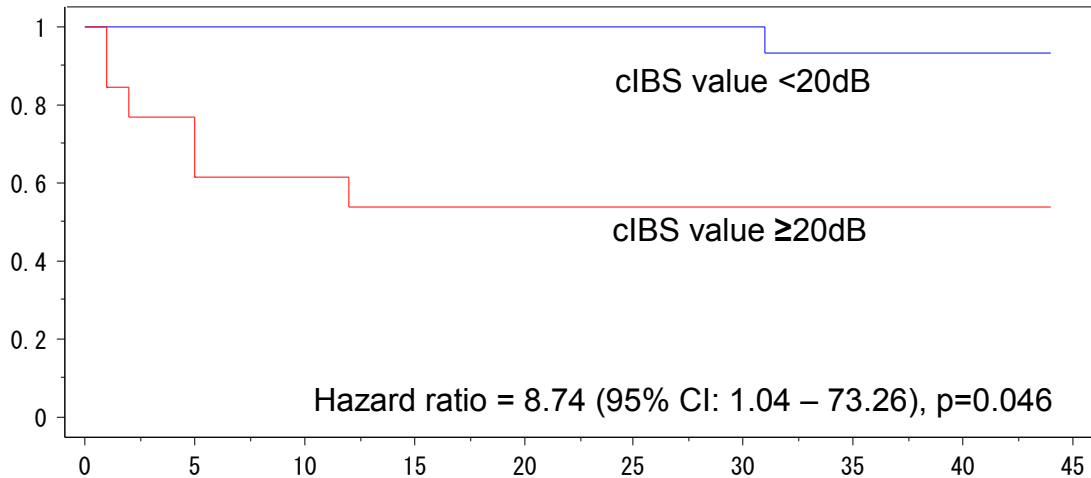

**Follow up (month)**

Supplement: MOESM2 [file 9555732]
